# Supplementary material for: Systematically assessing microbiome–disease associations identifies drivers of inconsistency in metagenomic research
Source: PubMed Central journal article supplement (PMC8890741; doi:10.1371/journal.pbio.3001556), 2022-03-02

A) T2D: 3 variable vibrations, at least 1 FDR significant

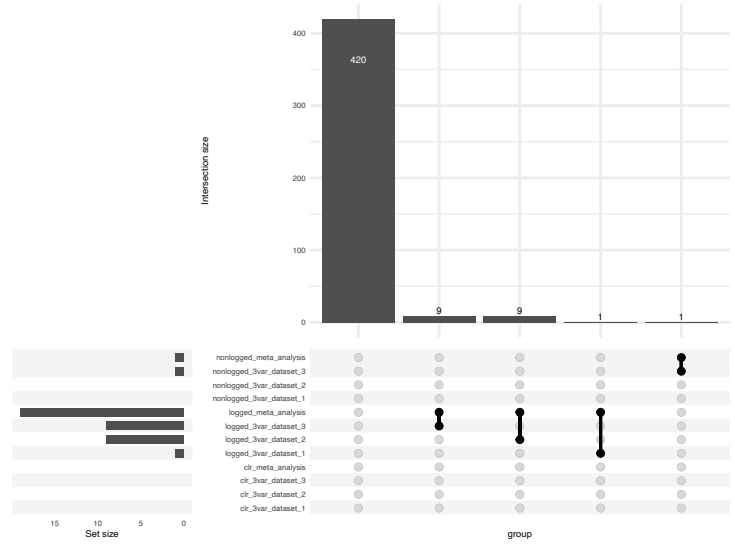

B) T2D: 6 variable vibrations, at least 1 FDR significant

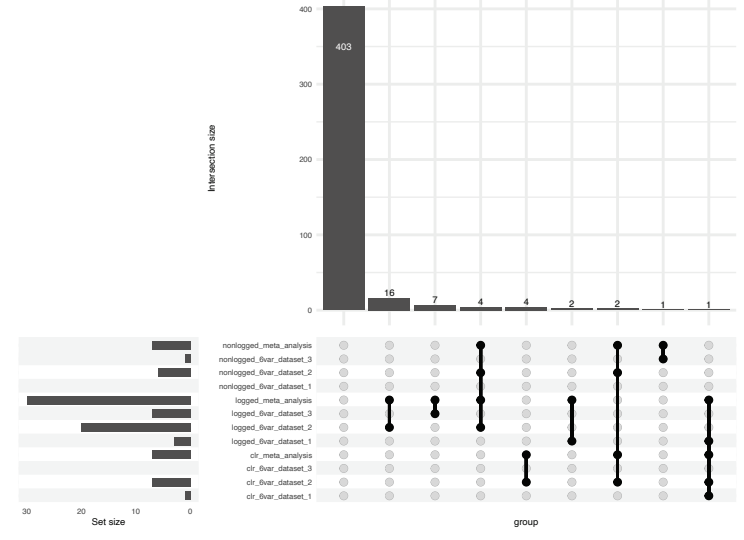

C) T2D: 9 variable vibrations, at least 1 FDR significant

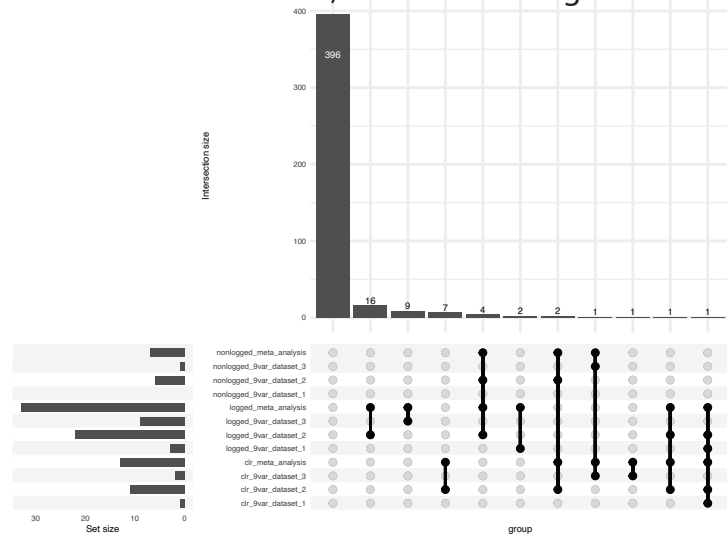

D) T2D -- Cohort with most adjusters, p-value significant once

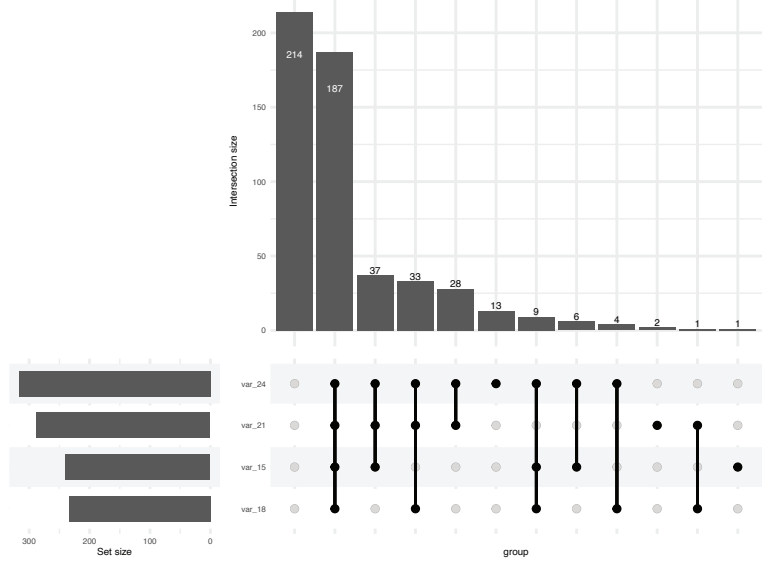

E) T2D -- Cohort with most adjusters, FDR significant once

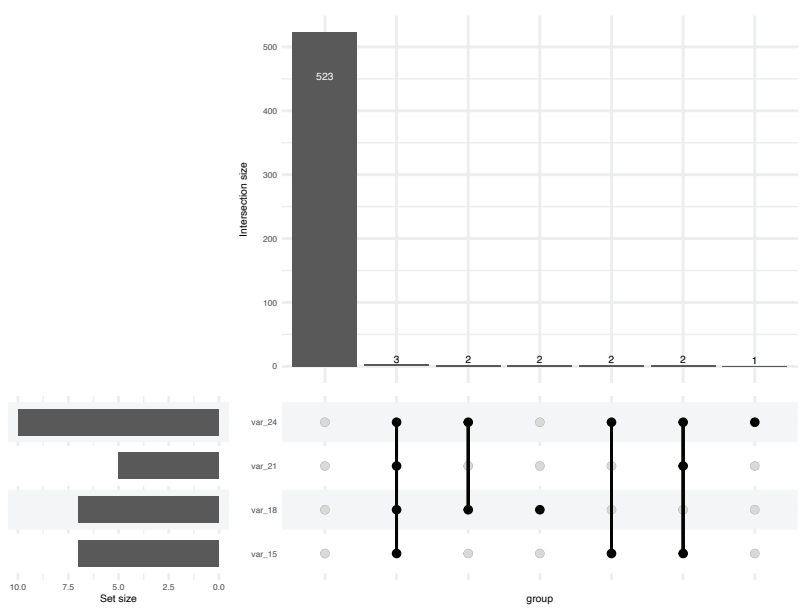

F) T2D -- Data transformation comparison

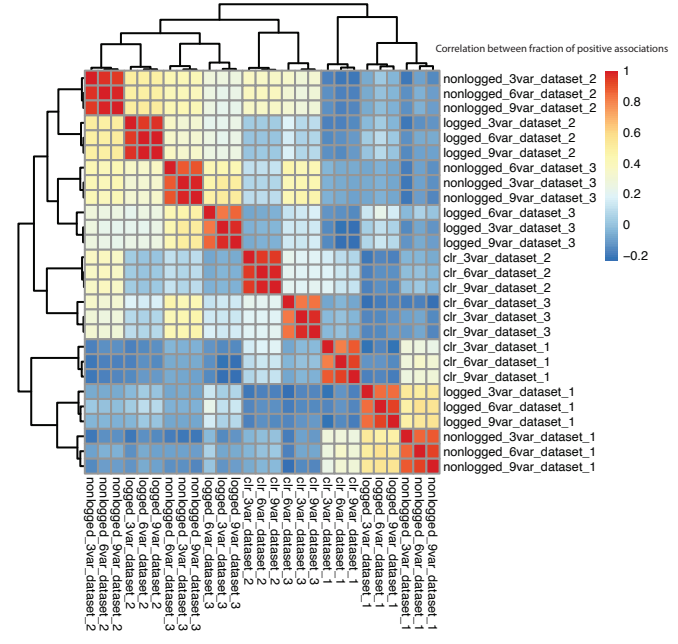

Supplement: pbio.3001556.s003.pdf [file pbio.3001556.s003.pdf]
