# Supplementary material for: Systematically assessing microbiome–disease associations identifies drivers of inconsistency in metagenomic research
Source: PubMed Central journal article supplement (PMC8890741; doi:10.1371/journal.pbio.3001556), 2022-03-02

# ACVD

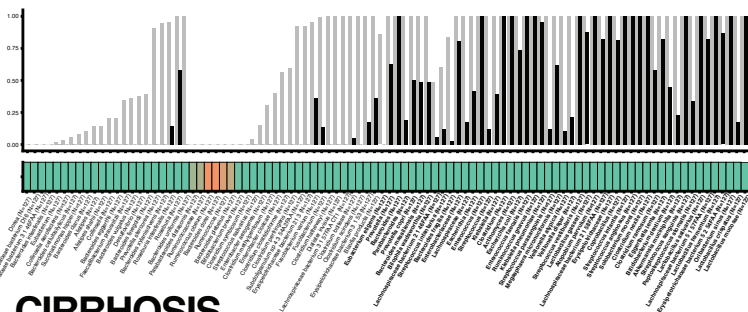

■ Fraction FDR significant  
■ Fraction nominally significant  
■ Fraction of associations that are positive  
0.2 0.4 0.6 0.8

# CIRRHOSIS

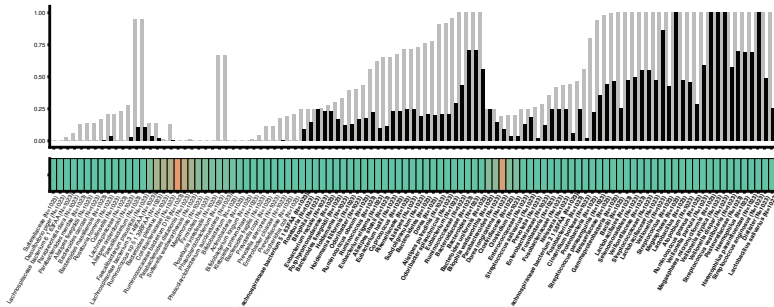

# CRC

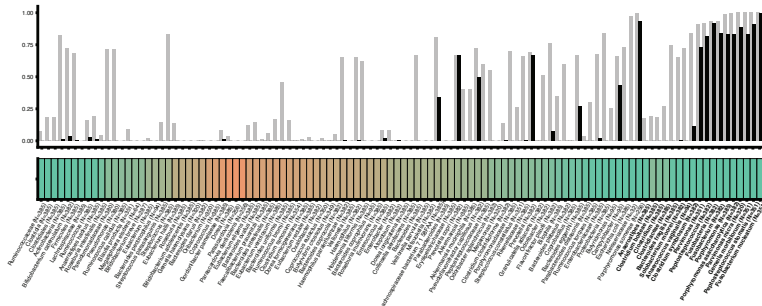

# IBD

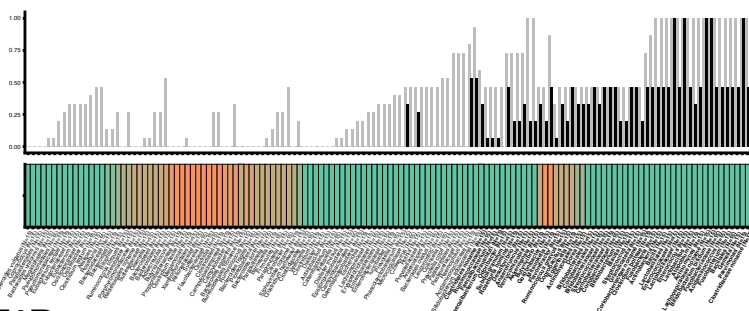

# T1D

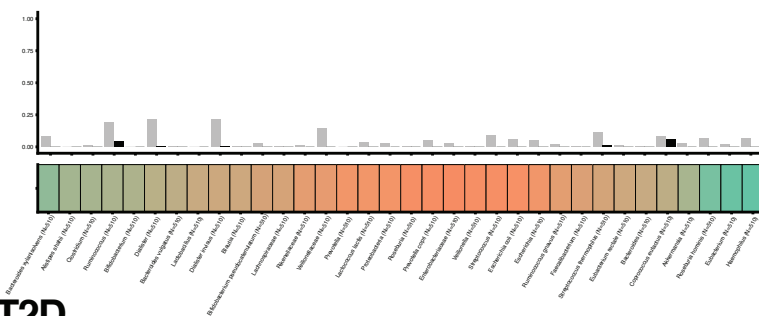

# T2D

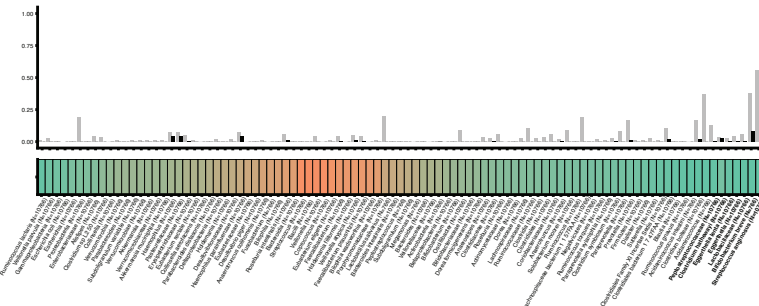

Supplement: pbio.3001556.s004.pdf [file pbio.3001556.s004.pdf]
