# Supplementary material for: Systematically assessing microbiome–disease associations identifies drivers of inconsistency in metagenomic research
Source: PubMed Central journal article supplement (PMC8890741; doi:10.1371/journal.pbio.3001556), 2022-03-02

A)

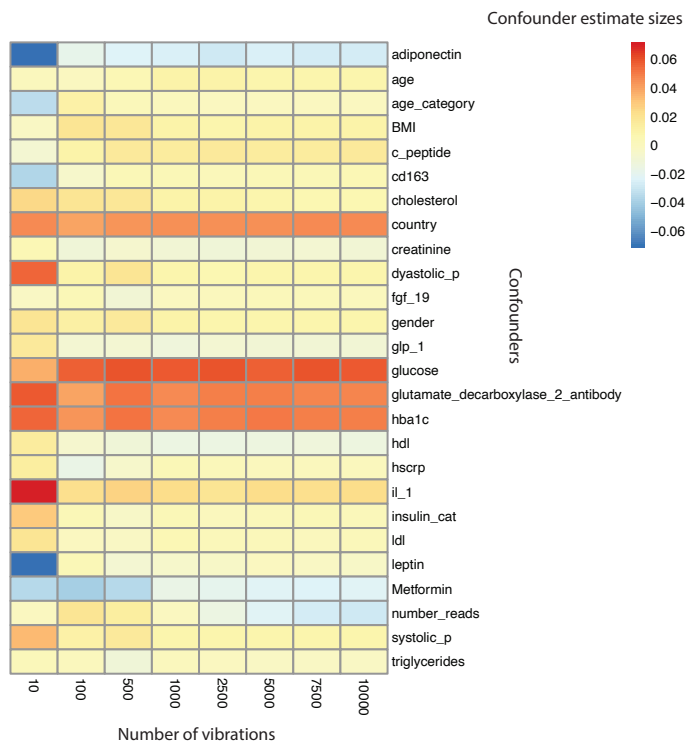

B)

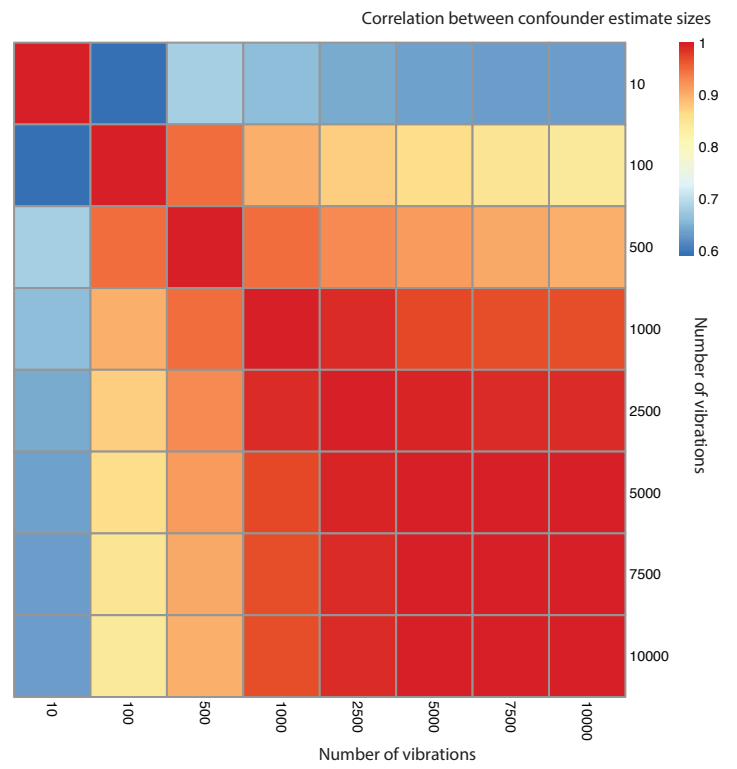

Supplement: pbio.3001556.s006.pdf [file pbio.3001556.s006.pdf]
